# Supplementary material for: Multi-omic signature of body weight change: results from a population-based cohort study
Source: Springer Nature journal article supplement (doi:10.1186/s12916-015-0282-y), 2015-03-06
Supplement: MOESM3 [file 9758716]

# Multi-omic signature of body weight change: results from a population-based cohort study

Simone Wahl\*, Susanne Vogt\*, Ferdinand Stücker, Jan Krumsiek, Jörg Bartel, Tim Kacprowski, Katharina Schramm, Maren Carstensen, Wolfgang Rathmann, Michael Roden, Carolin Jourdan, Antti J Kangas, Pasi Soininen, Mika Ala-Korpela, Ute Nöthlings, Heiner Boeing, Fabian J Theis, Christa Meisinger, Melanie Waldenberger, Karsten Suhre, Georg Homuth, Christian Gieger, Gabi Kastenmüller, Thomas Illig, Jakob Linseisen, Annette Peters, Holger Prokisch, Christian Herder, Barbara Thorand#, Harald Grallert#

## Additional file 3: Supplementary Figures

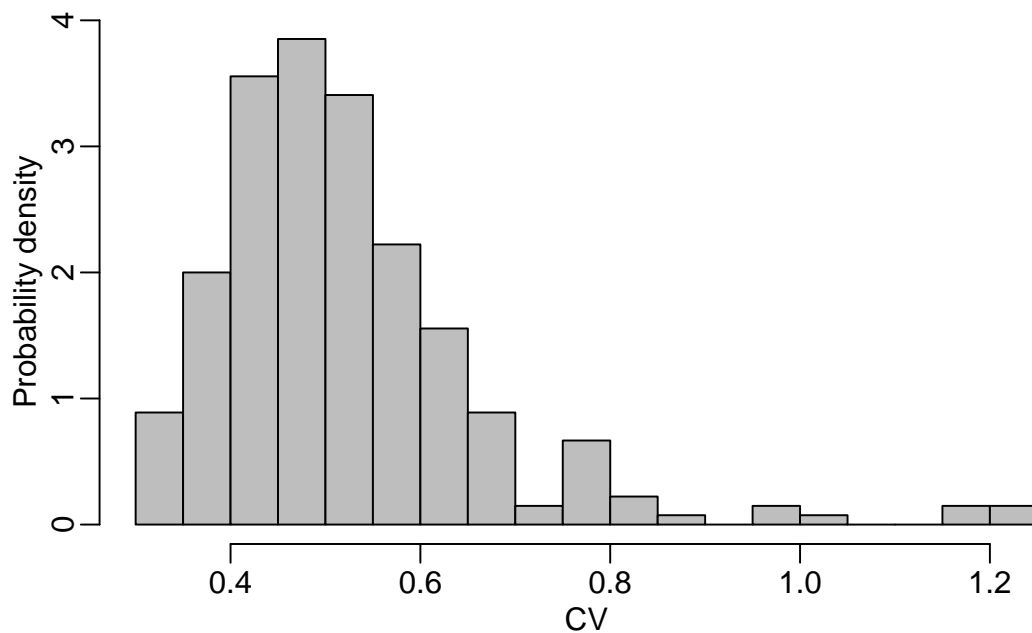

**Figure S1: Distribution of the variability of the day medians across the Metabolon metabolites.** Variability is expressed as coefficient of variation (CV) = standard deviation divided by mean.

---

\*,# contributed equally

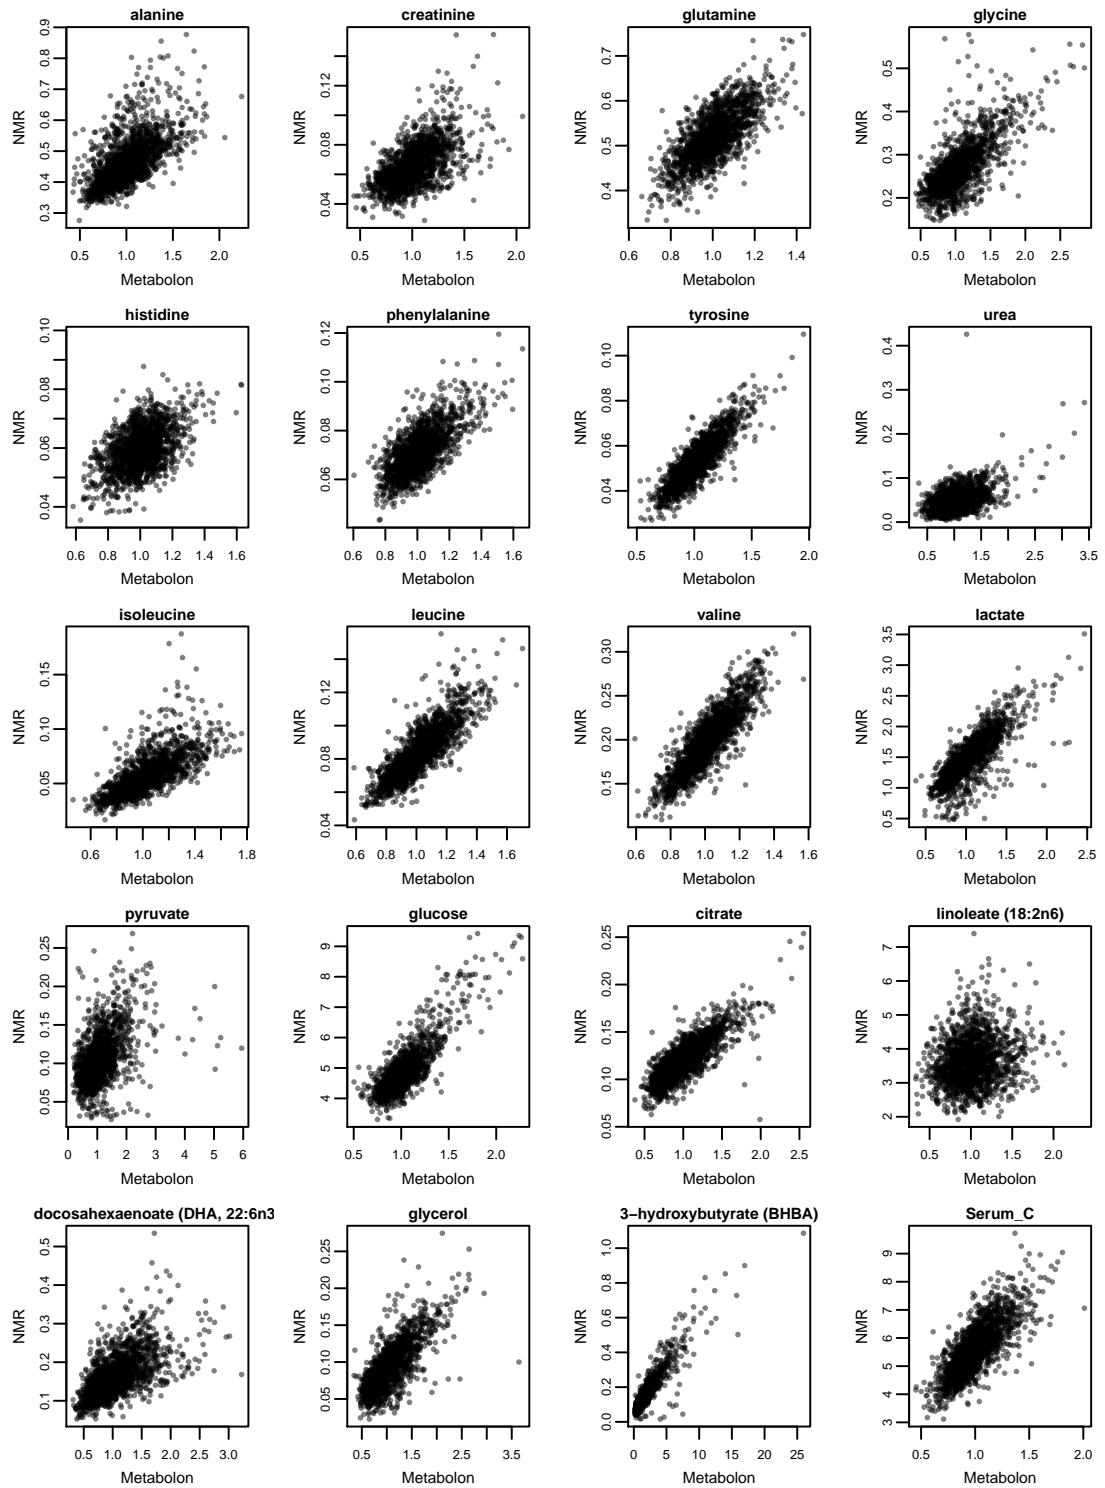

**Figure S2: Scatter plot of serum measurements on the Metabolon and NMR platforms.** Concentrations are shown in mmol/L.

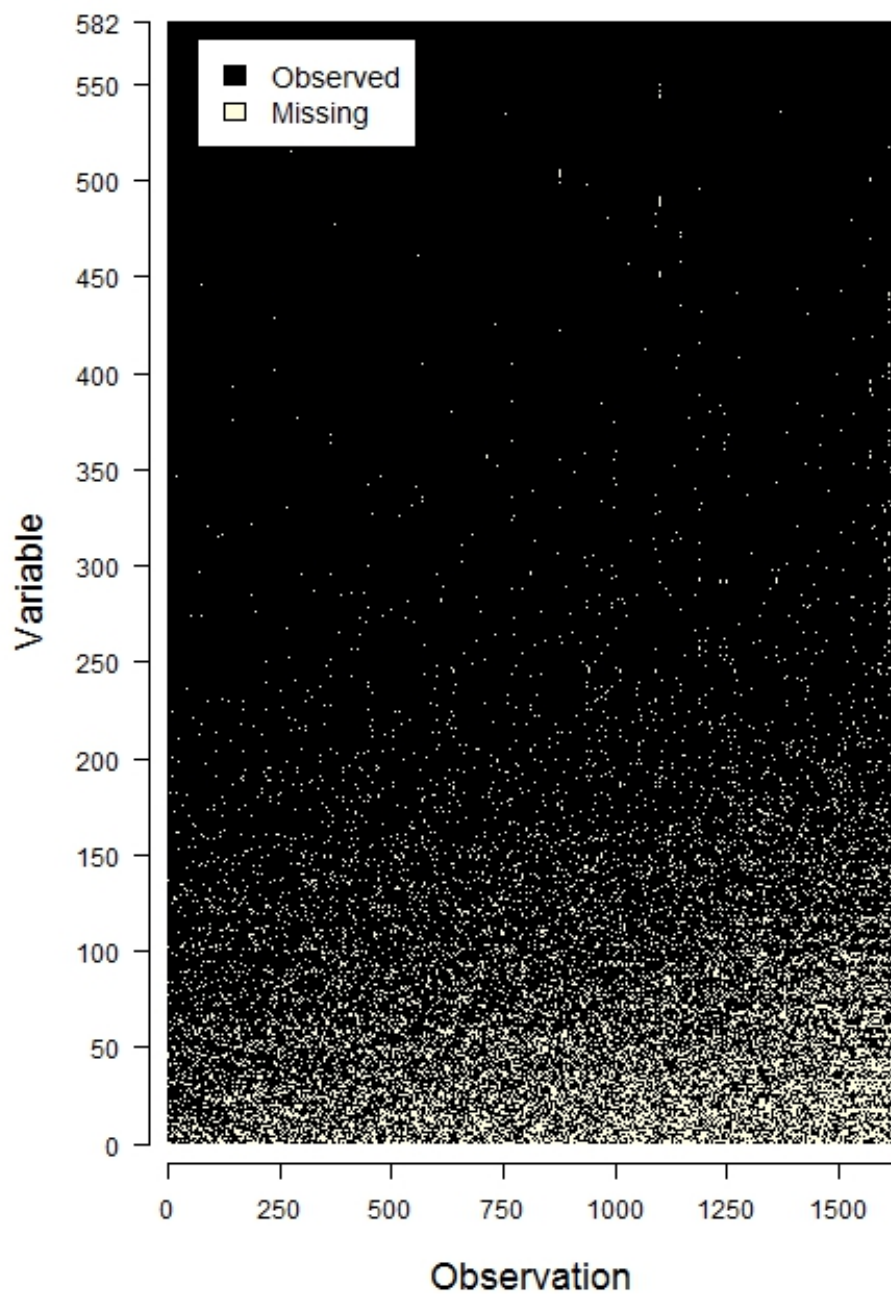

**Figure S3: Missingness pattern in the metabolomics data set.** Plot of missingness indicators (black, observed; light yellow, missing) for the 582 variables against the 1631 observations, both sorted by percentage of missing values.





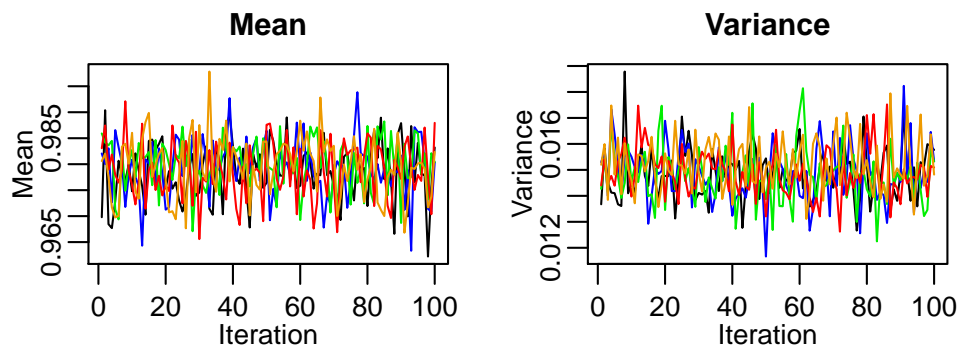

**Figure S6:** Convergence of the MICE algorithm for the metabolite with the largest proportion of missings (3-hydroxy-2-ethylpropionate [M]). Plotted is mean (left) and variance (right) of imputed values for each of 5 imputation chains across 100 iterations.

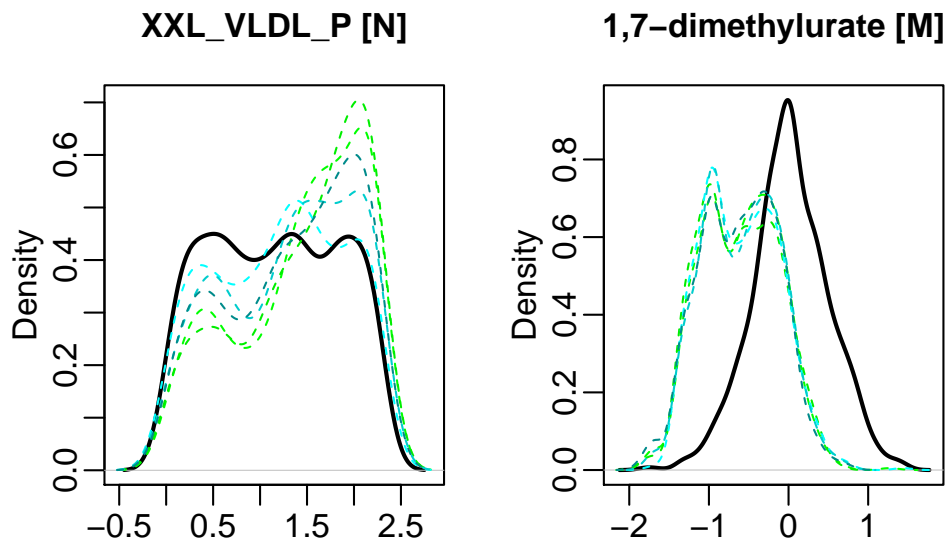

**Figure S7:** Imputation diagnostics for two selected variables. Kernel density plots of observed (black solid line) vs. imputed (dashed lines in different shades of green) values, shown for the first five imputations.

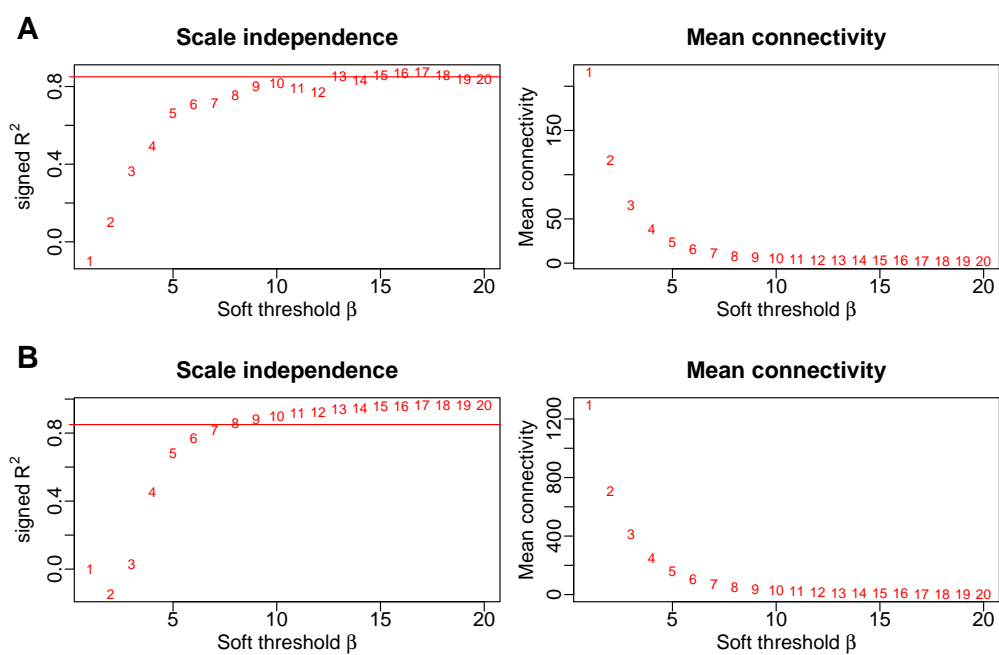

**Figure S8: Choice of the scale-free topology parameter  $\beta$  in weighted correlation network analysis (WGCNA).** **A** Metabolomics data. **B** Gene expression data. The smallest  $\beta$  (13 and 8, respectively) with  $R^2 \geq 0.85$  was chosen.

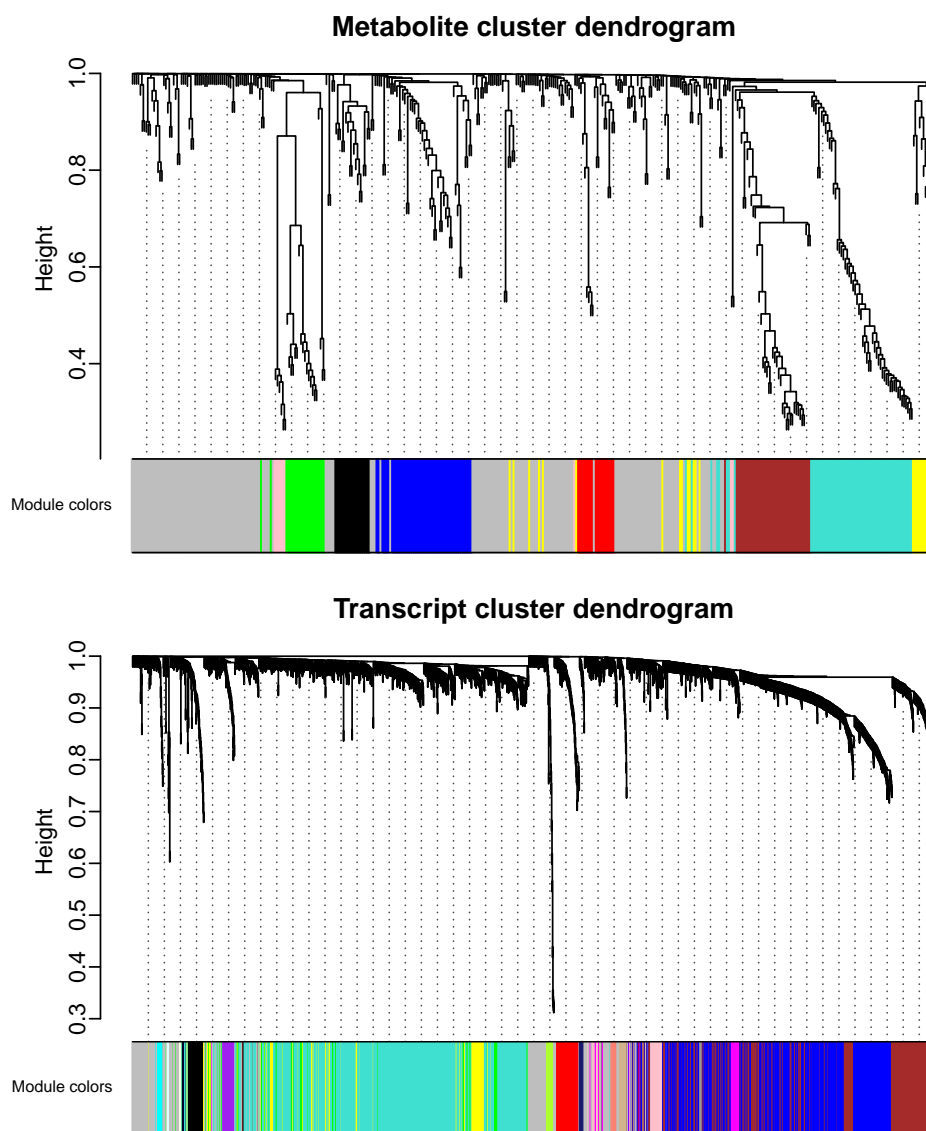

**Figure S9: Weighted correlation network analysis (WGCNA) cluster dendrograms.** Metabolomics data and gene expression data were clustered into 8 and 19 modules, respectively. Grey color represents features showing a low connectivity that are not assigned to a cluster.



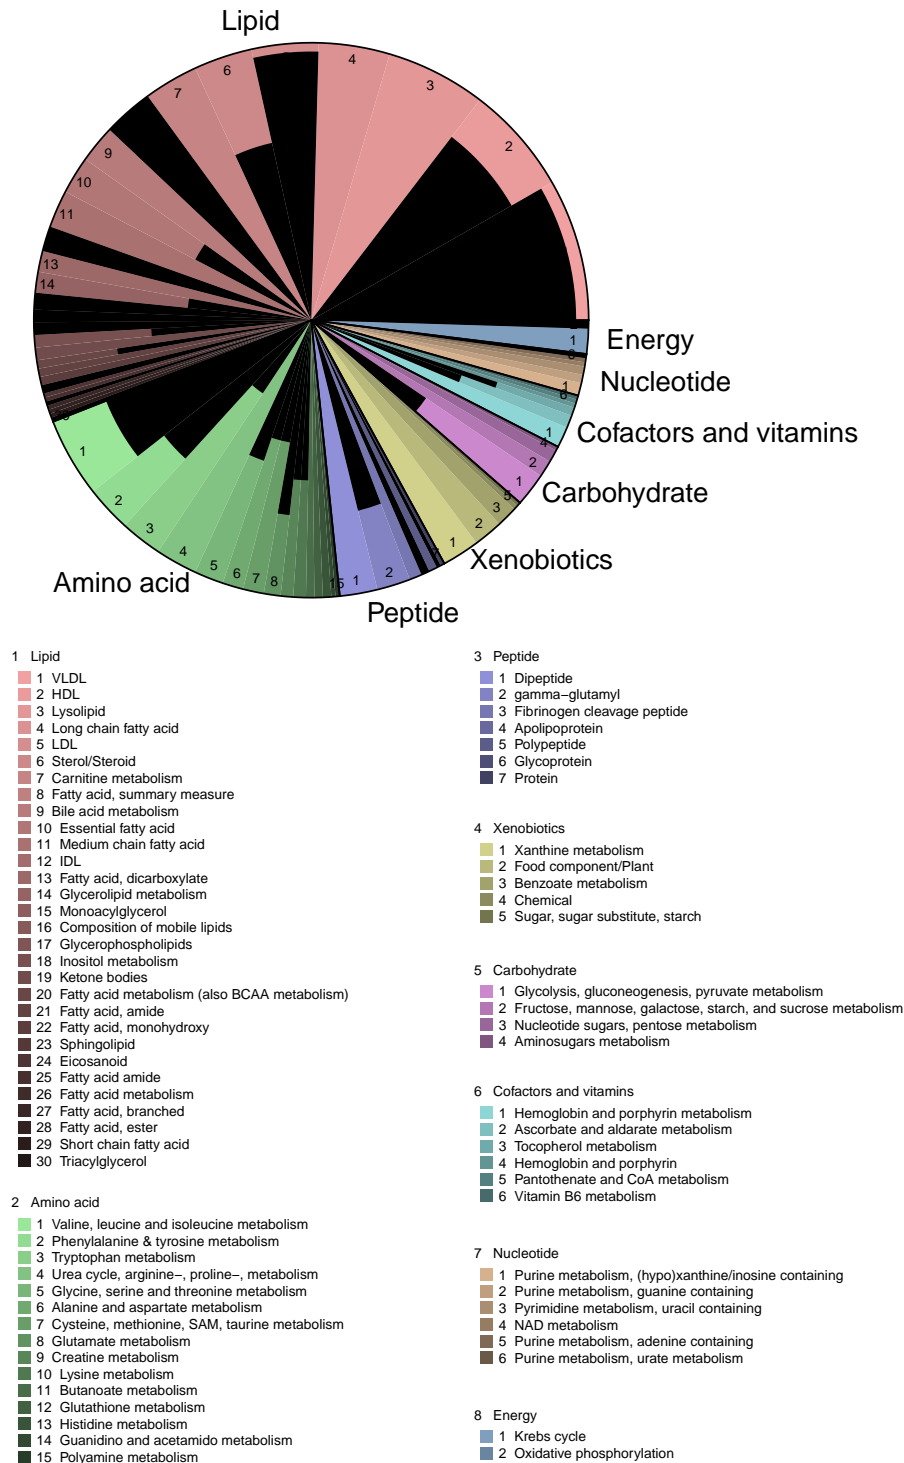

**Figure S10: Joint coverage of the serum metabolome by the four metabolite modules related to annual percentage body weight change ( $\Delta BW$ ).** Pie chart with color indicating super-/sub-pathway as described in the legend, and size of wedges representing the number of metabolites in the data set corresponding to the respective sub-pathway. Sorted by pathway size. Black wedges represent the joint number of metabolites from MetM1 (the TG/VLDL module), MetM3 (the LDL/IDL module), MetM4 (the BCAA module) and MetM5 (the HDL module) in the respective sub-pathway.

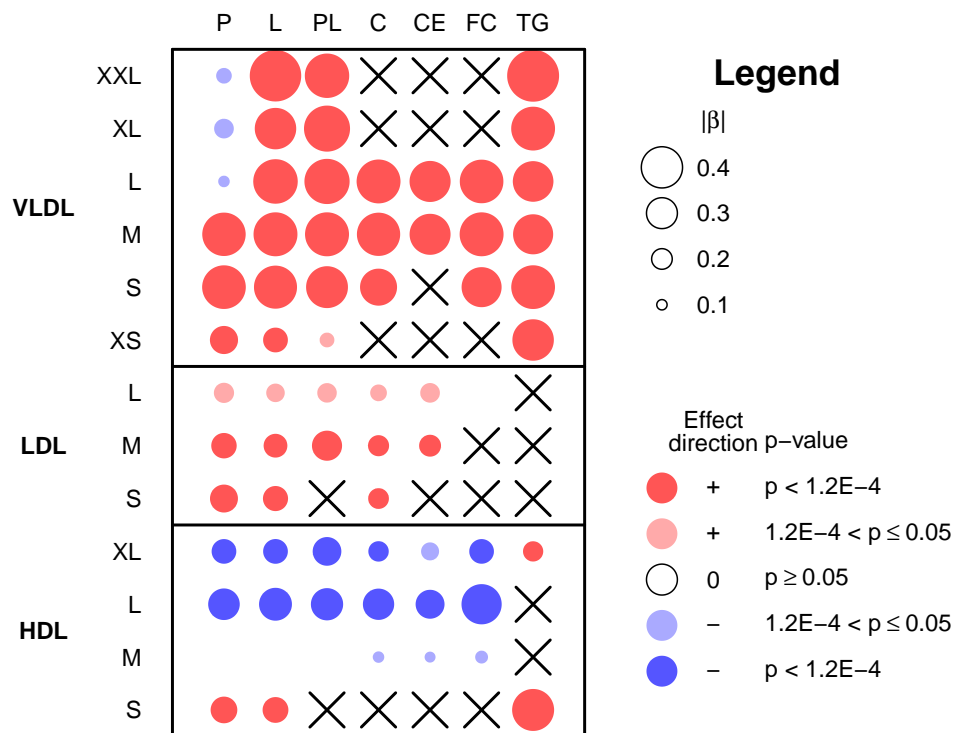

**Figure S11: Association of annual percentage body weight change ( $\Delta BW$ ) with lipoprotein subclasses.** Bubbles represent effects strengths and significance, as described in the legend. Models were adjusted for age, sex and baseline body weight. For single metabolites, the significance threshold was chosen as  $P < 1.2 \times 10^{-4}$  corresponding to Bonferroni correction for 441 tests. P, particle concentration; L, total lipids; PL, phospholipids; C, total cholesterol; CE, cholesterol esters; FC, free cholesterol; TG, triglycerides. Note that C represents the sum of CE and FC, and L the sum of C, PL and TG.

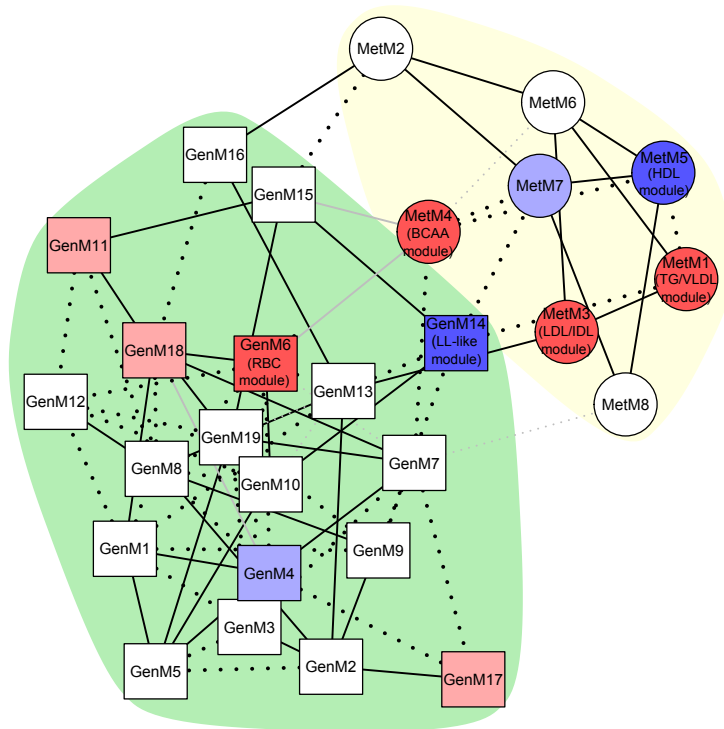

**Figure S12: Multi-omic partial correlation network comprising the 8 metabolite and the 19 gene expression modules.** Nodes represent omics modules (circle, metabolite module (MetM); rectangle, gene expression module (GenM)), colored according to their association with annual percentage body weight change ( $\Delta BW$ ; red, positive association; blue, negative association; bright color, significant  $P < 1.9 \times 10^{-4}$ ; light color,  $P < 0.05$ ). Edges represent partial correlations ( $\zeta$ ) between pairs of modules (represented by their module eigengenes (MEs)), conditional on all other presented modules and the covariates age, sex, and  $\Delta BW$  (solid black line,  $\zeta > 0.1$ ; dotted black line,  $\zeta < -0.1$ ; solid grey line,  $0.05 < \zeta < 0.1$ ; dotted grey line,  $-0.1 < \zeta < -0.05$ ). Background color reflects metabolite (yellow) vs. gene expression (green) modules.

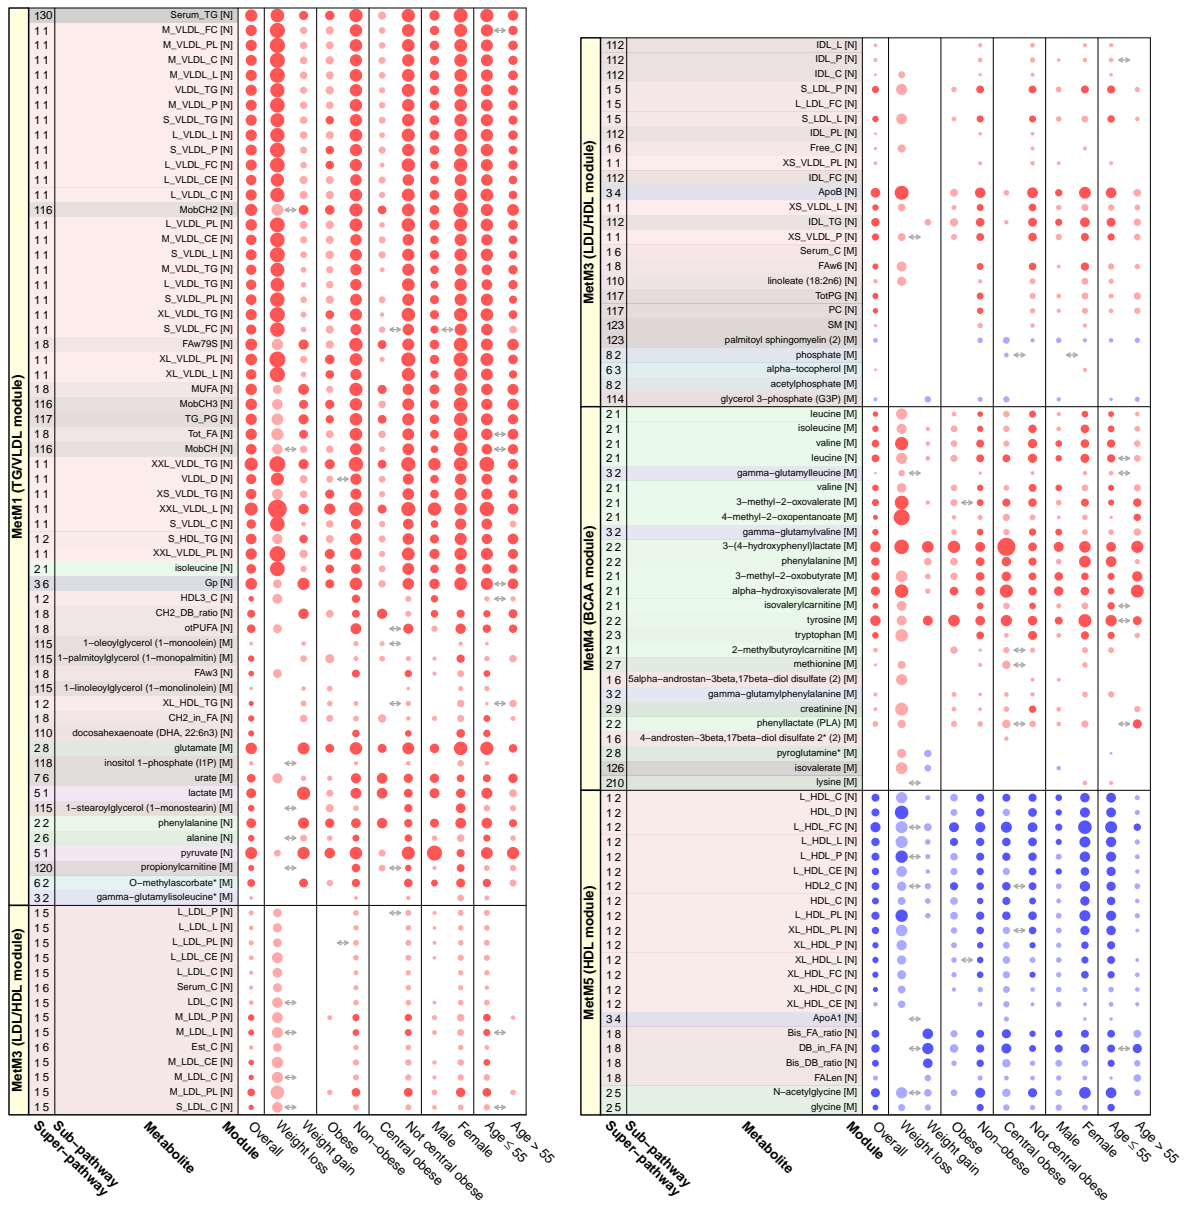

**Figure S13: Association of annual percentage body weight change ( $\Delta BW$ ) with members of associated metabolite modules (MetM) – results of the stratified analyses.** Shown are associations for the overall study population (column 1) and for subgroups (columns 2-11). Bubbles represent effect strengths and significance, see legend of Figure 2. Models were adjusted for age, sex and baseline body weight. Significance threshold  $P < 1.2 \times 10^{-4}$  corresponds to Bonferroni correction for 411 metabolites. For subgroup analyses (columns 2-11), interaction models were fitted, to obtain main  $\Delta BW$  effect in the respective subgroups, and  $\Delta BW$ :subgroup interaction effect indicating difference in effect between the subgroups. Background colors correspond to super- and sub-pathway annotation, see legend of Figure S8 in Additional file 3.

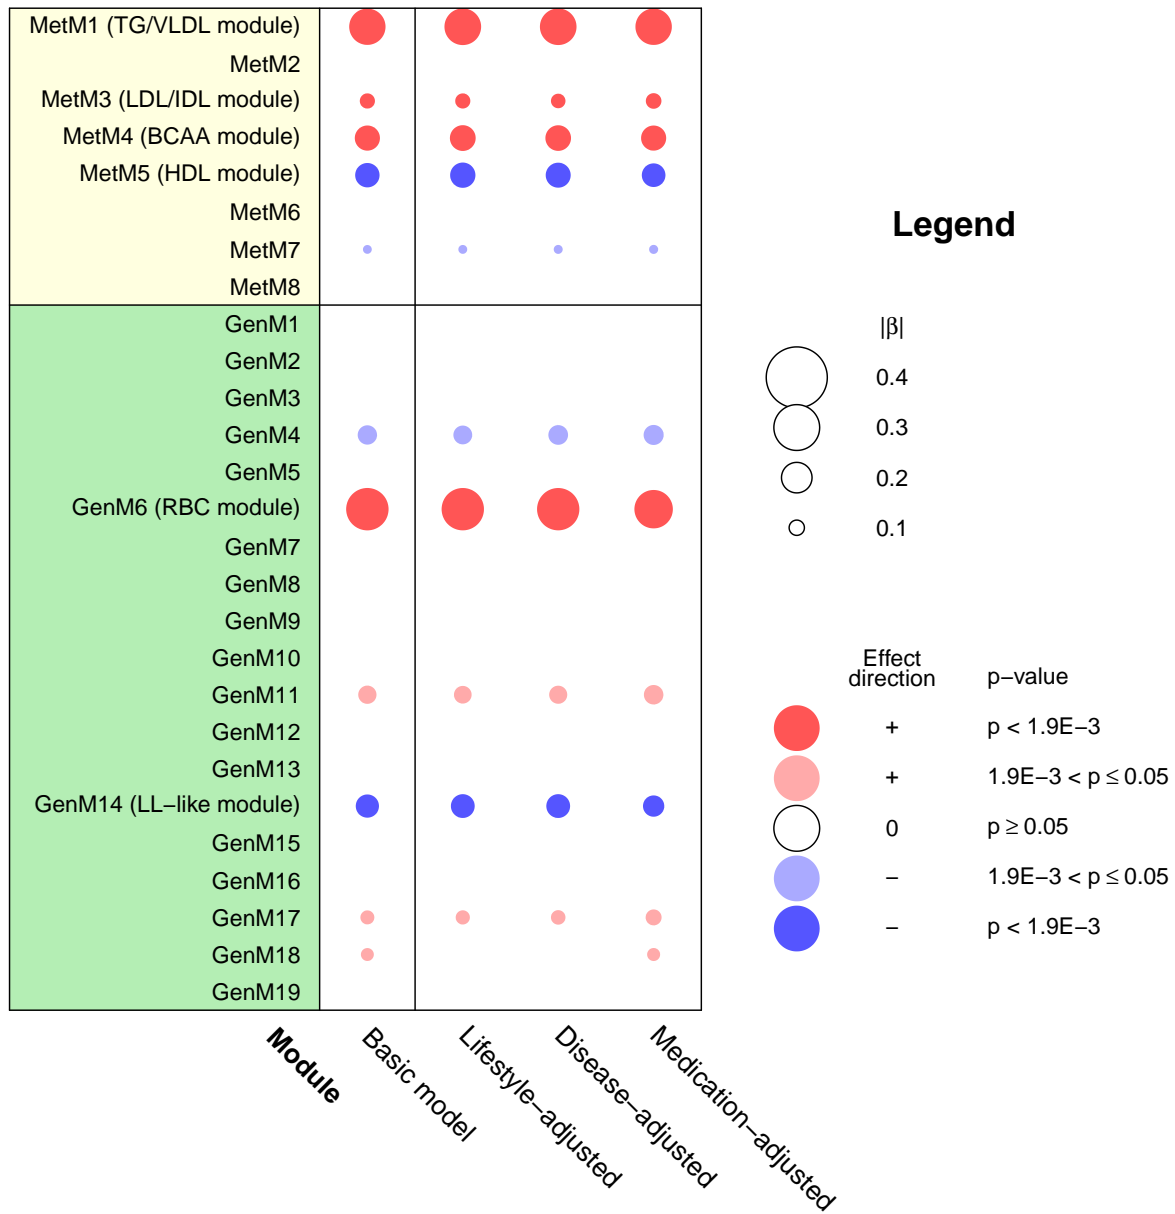

**Figure S14: Association of annual percentage body weight change ( $\Delta BW$ ) with omics modules adjusting for factors driving weight change.** Bubbles represent effect strengths and significance, as described in the legend. Models were adjusted for age, sex and baseline body weight. Significance threshold  $P < 1.9 \times 10^{-3}$  corresponds to Bonferroni correction for 27 modules. Lifestyle-adjusted: changes in physical activity, baseline nutritional score, changes in sleeping behavior, smoking and alcohol drinking were included as covariates in the model. Disease-adjusted: incident diabetes, cancer, myocardial infarction and stroke were included as covariates in the model. Medication-adjusted: change in the intake of beta-blockers, metformin, other antidiabetic drugs, systemic corticoids, oral contraceptives and antidepressants were included as covariates in the models (see descriptives in Table S9). GenM, gene expression module; MetM, metabolite module.
